# Supplementary material for: Time-gated luminescence bioimaging with new luminescent nanocolloids based on [Mo6I8(C2F5COO)6]2−metal atom clusters
Source: Royal Society of Chemistry journal article supplement (doi:10.1039/c6cp05290h), 2016-01-01
Supplement: c6cp05290h1.pdf [file c6cp05290h1.pdf]

## Supporting Information

### **Time-Gated Luminescence Bioimaging with new Luminescent Nanocolloids based on $[\text{Mo}_6\text{I}_8(\text{C}_2\text{F}_5\text{COO})_6]^{2-}$ Metal Atom Clusters**

By *Chrystelle Neaime, Maria Amela-Cortes, Fabien Grasset\*, Yann Molard, Stéphane Cordier\*, Benjamin Dierre, Michel Mortier, Toshiaki Takei, Kohsei Takahashi, Hajime Haneda, Marc Verelst and Séverine Lechevallier\**

Dr. Chrystelle Neaime, Dr. Marian Amela-Cortes, Dr. Fabien Grasset, Dr. Yann Molard, Dr. Stéphane Cordier  
CNRS-UR1, UMR 6226, Institut des Sciences Chimiques de Rennes (ISCR), Université de Rennes 1, Campus de Beaulieu, 35042 Rennes Cedex, France  
fabien.Grasset@univ-rennes1.fr  
stephane.cordier@univ-rennes1.fr

Dr. Fabien Grasset, Dr. Benjamin Dierre  
CNRS-Saint Gobain-NIMS, UMI 3629 NIMS-CNRS-Saint Gobain, Laboratory for Innovative Key Materials and Structures-LINK, National Institute of Material Science (NIMS), 1-1 Namiki, 305-0044, Tsukuba, Japan

Dr. Michel Mortier  
Institut de Recherche de Chimie Paris, CNRS, Chimie ParisTech, PSL Research University, 11 rue Pierre et Marie Curie, 75005 Paris, France

Dr. Toshiaki Takei  
International Center for Materials Nanoarchitectonics, MANA, National Institute of Material Science, 1-1 Namiki, Tsukuba 305-0044, Japan

Dr. Kohsei Takahashi, Dr. Hajime Haneda  
National Institute of Material Science, 1-1 Namiki, Tsukuba 305-0044, Japan

Dr. Marc Verelst, Séverine Lechevallier  
CHROMALYS, 29 rue Jeanne Marvig, 31400 Toulouse

### *Experimental*

#### *Preparation of $\text{Cs}_2\text{Mo}_6\text{I}_8(\text{C}_2\text{F}_5\text{COO})_6$ Metal Clusters*

The  $\text{Cs}_2\text{Mo}_6\text{I}_8(\text{C}_2\text{F}_5\text{COO})_6$  cluster compound was prepared from  $\text{Cs}_2\text{Mo}_6\text{I}_{14}$  and  $\text{AgOCOC}_2\text{F}_5$

(See sketch below )

Sketch of the synthesis of  $\text{Cs}_2\text{Mo}_6\text{I}_8(\text{C}_2\text{F}_5\text{COO})_6$  clusters (CMIF)

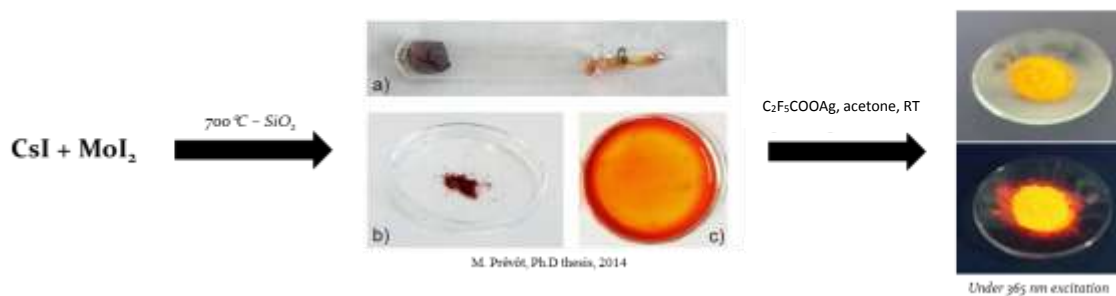

$\text{Cs}_2\text{Mo}_6\text{I}_{14}$ : First,  $\text{MoI}_2$  starting compound was synthesized by heating a stoichiometric mixture of Mo (Plansee 99.8 %) and  $\text{I}_2$  (Alfa Aesar 99.8 %) at 700 °C for 4 days in a silica tube (noted  $\text{SiO}_2$  in the sketch) sealed under vacuum. Afterwards,  $\text{Cs}_2\text{Mo}_6\text{I}_{14}$  was prepared using CsI (Alfa Aesar 99.9 %) and  $\text{MoI}_2$ . The mixture (0.5 g) was ground, formed as a pellet and placed into silica tube (o.d. 9 mm, i.d. 7 mm, length 70 mm). Once sealed under vacuum, the tube was heated for three days at 700 °C. The X-ray powder pattern of the final product did not evidence the presence of any impurity. Red thin plate-shaped crystals of  $\text{Cs}_2\text{Mo}_6\text{I}_{14}$  were obtained after a 100 °C/day cooling rate of temperature.

$\text{Cs}_2\text{Mo}_6\text{I}_8(\text{C}_2\text{F}_5\text{COO})_6$ : To a solution of  $\text{Cs}_2\text{Mo}_6\text{I}_{14}$  (1.5 g, 0.52 mmol) in 20 mL of acetone, was added a solution of silver pentafluoropropionate (0.935 g, 3.42 mmol) in 10 mL of acetone under argon and in the dark. The mixture was stirred for 48 h in the dark and then was filtered through a Celite® pad. The red solution was then evaporated to yield a red-orange powder. Yield = 97%.  $^{19}\text{F}$ -NMR (acetone- $d_6$ ):  $\delta$  (ppm) = -83 (3F), -120 (2F). EDAX: Cs 2, Mo 8, I 11, F 77, no Ag.

Single-crystal X-ray diffraction data of  $\text{Cs}_2\text{Mo}_6(\text{C}_2\text{F}_5\text{COO})_6$  and  $\text{Cs}_2\text{Mo}_6\text{I}_{14}$  were collected at room temperature on a Bruker AXS APEX-II diffractometer or a Nonius KappaCCD X-ray area-detector diffractometer with Mo  $K\alpha$  radiation ( $\lambda = 0.71073\text{\AA}$ ) respectively (see references 45 c and d) .

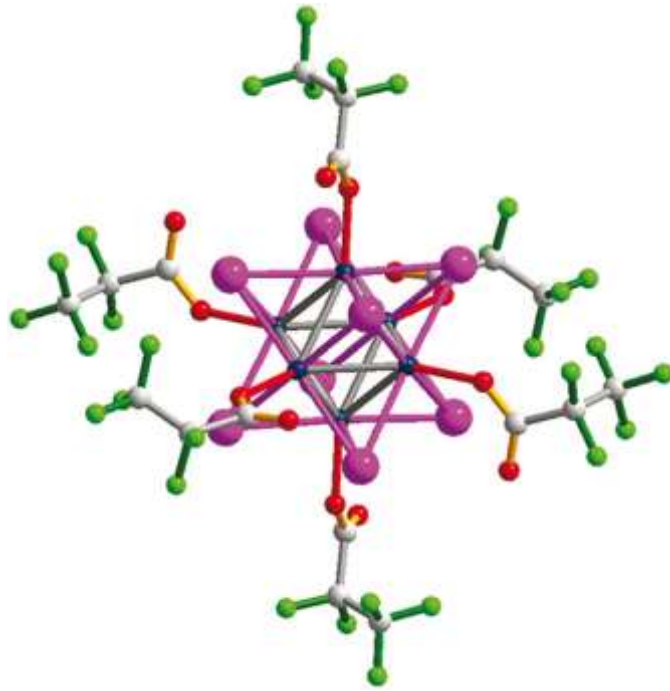

Representation according to single crystal data X-ray diffraction measurements of  $\text{Cs}_2\text{Mo}_6\text{I}_8(\text{C}_2\text{F}_5\text{OCO})_6$ . (see reference 45c)

*Preparation of  $\text{Cs}_2\text{Mo}_6\text{I}_8(\text{C}_2\text{F}_5\text{COO})_6@ \text{SiO}_2$  nanocolloids*

The functional silica nanoparticles have been prepared using a water-in-oil (W/O) microemulsion process developed by our group since the earlier 2000 (see general sketch below).

The hydrodynamic diameter of all the types of silica nanoparticles was found to be centered around 60 nm from the dynamic light scattering data in aqueous dispersion at pH = 7.

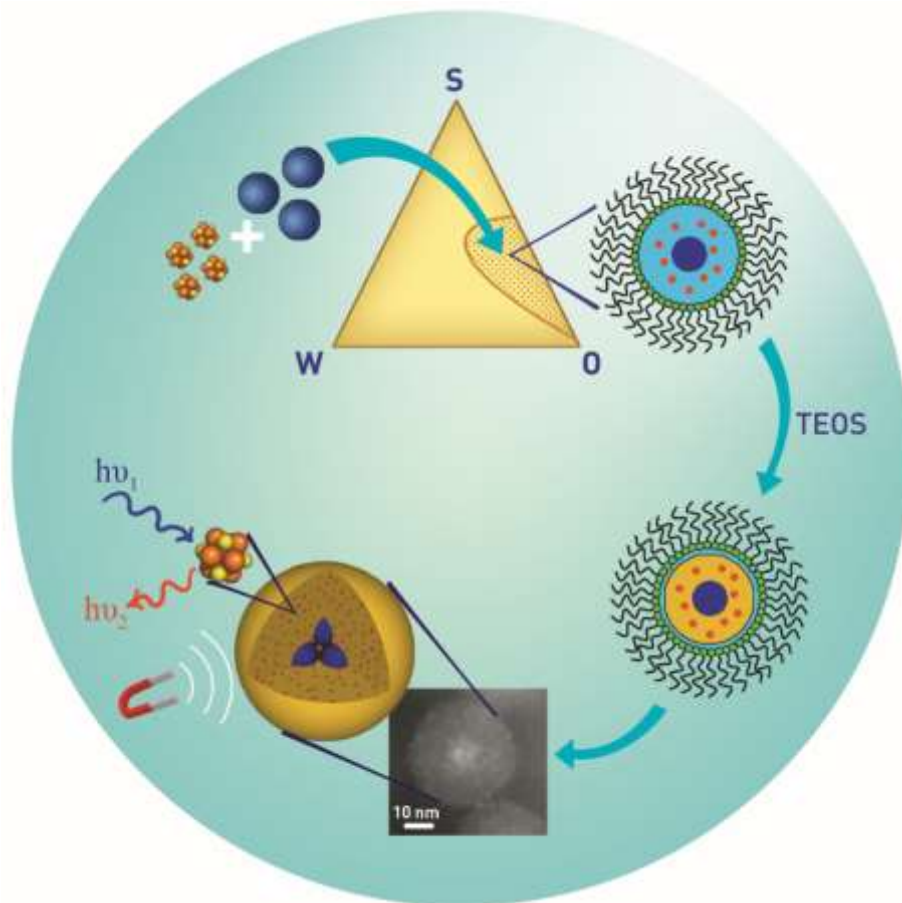

Dynamic Light Scattering (DLS): To determine the mean hydrodynamic diameter,  $d(H)$ , of the nanocrystals, DLS investigations on sols were performed with a Zetasizer Nano ZS from Malvern Instruments using the new noninvasive backscattering (NIBS) technology and by detecting scattering information at an angle of  $173^\circ$  rather than the conventional  $90^\circ$ . The DLS technique measures the particle diffusion due to Brownian motion and relates it to the particle size. The particle size is classically determined according to the Stokes–Einstein equation.

$^{19}\text{F}$  NMR: experiments were realized at 376 MHz on a Bruker Ascend 400 MHz NMR spectrometer.

UV-Vis experiments: They have been conducted using a Cary 5000 UV-Vis-NIR spectrophotometer. Measurements have been realized using Hellma® 101-QS quartz cuvettes (10 mm).
